# Supplementary material
Source: PubMed Central journal article supplement (PMC6995685)
Supplement: NIHMS1068412-supplement-Supplemental_Figures.pdf [file NIHMS1068412-supplement-Supplemental_Figures.pdf]

**Supporting Information for**  
**Conformational Flexibility of the Protein-Protein Interfaces of the Ebola**  
**Virus VP40 Structural Matrix Filament**

Elumalai Pavadai<sup>1,#</sup>, Nisha Bhattarai<sup>1</sup>, Prabin Baral<sup>1</sup>, Robert V. Stahelin<sup>2</sup>, Prem P. Chapagain<sup>\*1,3</sup>,  
Bernard S. Gerstman<sup>\*1,3</sup>,

<sup>1</sup>Physics Department, Florida International University, Miami FL 33199, USA

<sup>2</sup>Department of Medicinal Chemistry and Molecular Pharmacology and the Purdue University  
Cancer Center, Purdue University, West Lafayette, IN 47907, USA

<sup>3</sup>Biomolecular Sciences Institute, Florida International University, Miami, FL 33199, USA

<sup>#</sup>Current address: Department of Physiology & Biophysics, Boston University School of  
Medicine, 700 Albany Street, Boston MA 02118, USA

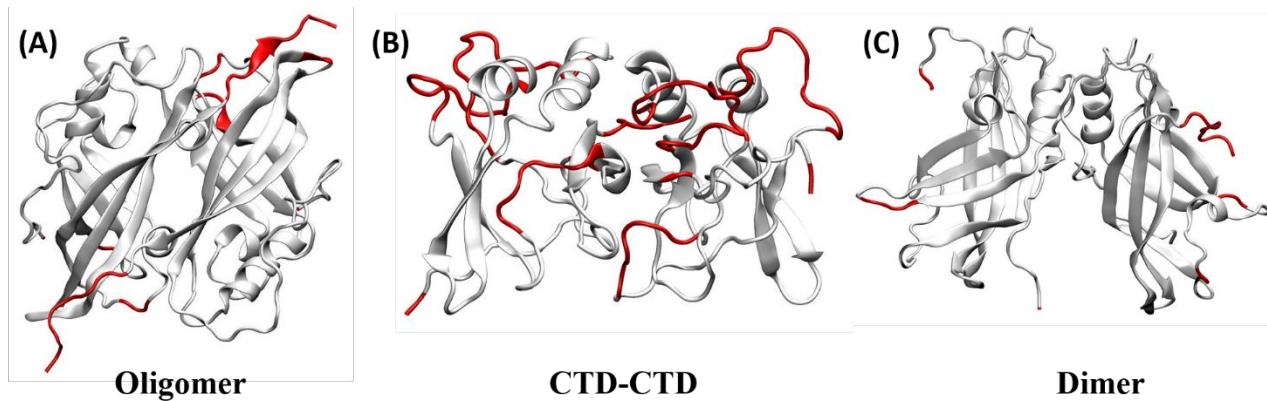

Figure S1. For each interface, residues that were missing from the PDB 3D crystal structure have been inserted using the Modeller 9.17 software package<sup>19</sup>. Residues highlighted in red are residues that were added using Modeller.

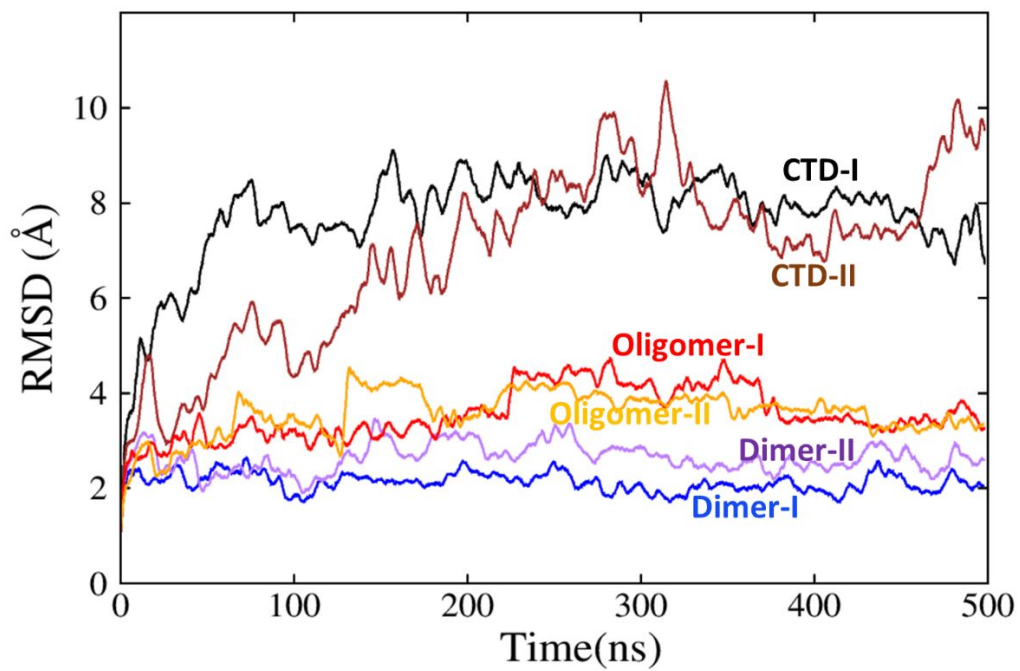

Figure S2. For each interface, the RMSD of each member is plotted separately. The results show that for each interface, both members exhibit similar flexibility.

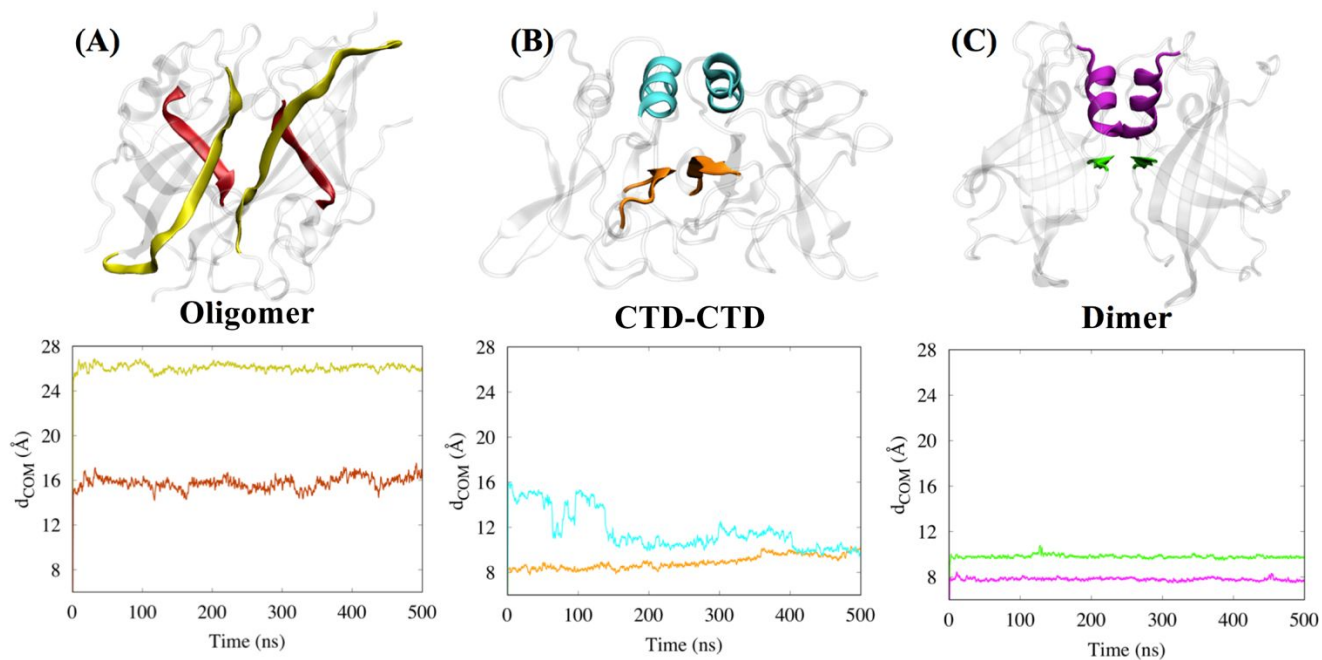

Figure S3. For the structural elements located at the three interfaces of Fig. 4, fluctuations in the distance between the structural elements of each group as a function of simulation time.

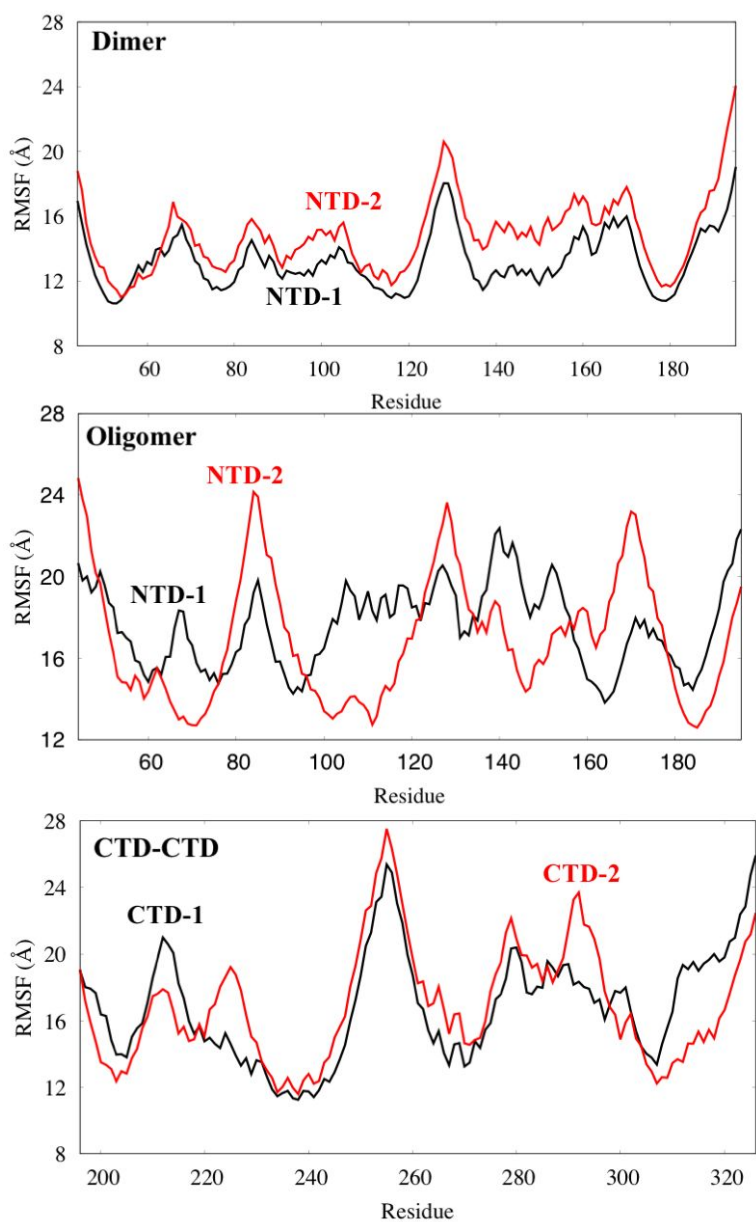

Figure S4. Root-mean-square fluctuations (RMSF) computed from the last 100 ns trajectory for the  $C_{\alpha}$  atoms of the interface structural elements of Fig. 4.

Table S1. An expanded version of Table 2 with additional information about the interactions.

| Community         | Oligomer              |                        |                             | Dimer            |       |                             | CTD-CTD          |                   |                            |
|-------------------|-----------------------|------------------------|-----------------------------|------------------|-------|-----------------------------|------------------|-------------------|----------------------------|
|                   | NTD1                  | NTD2                   | Interaction-type            | NTD1             | NTD-2 | Interaction-type            | CTD1             | CTD-2             | Interaction-type           |
| Comm-1            | P93                   | P187                   | hydrophobic                 | A113, L117       | T112  | hydrogen bond               | V306, I304, T308 | T304              | hydrogen bond              |
|                   | K90, I92              | A189                   | hydrophobic , hydrogen bond | I54, A55         | R52   | hydrogen bond               |                  |                   |                            |
|                   | M89, K90              | T190                   | hydrogen bond               | D56, D57         | R52   | salt-bridge                 |                  |                   |                            |
|                   | L88, M89              | W191                   | hydrogen bond               | A55, I59         | L117  | hydrophobic                 |                  |                   |                            |
|                   | L88, V87              | T192                   | hydrogen bond               | A55, M116        | M116  | hydrogen bond               |                  |                   |                            |
|                   | Q91                   | A188, A189             | hydrogen bond               | T112             | L117  | hydrogen bond               |                  |                   |                            |
|                   | I92                   | A189                   | Hydrophobic                 | R52, M116, L117  | A55   | hydrophobic , hydrogen bond |                  |                   |                            |
|                   |                       |                        |                             | R52              | D57   | salt-bridge                 |                  |                   |                            |
|                   |                       |                        |                             | L117             | I59   | hydrophobic                 |                  |                   |                            |
| Comm-2            | S70, V100             | P164                   | hydrophobic , hydrogen bond | D109, S110, A113 | D109  | hydrophobic , hydrogen bond | P234             | Q238, T242        | hydrogen bond              |
|                   | V100                  | E160, F161, V162, L163 | hydrophobic , hydrogen bond |                  |       |                             |                  |                   |                            |
|                   | A72, Q184             | W95                    | hydrophobic , hydrogen bond |                  |       |                             |                  |                   |                            |
|                   | L186, P187            | P93                    |                             |                  |       |                             |                  |                   |                            |
| Comm-3            | T190                  | M89, K90               | hydrogen bond               |                  |       |                             | L295             | R214, S316        | hydrogen bond              |
|                   | W191                  | L88, M89               | hydrogen bond               |                  |       |                             | P297             | K212, L213, P215, | hydrophobic, hydrogen bond |
|                   | W95, Q160, F161, L163 | V100                   | hydrophobic , hydrogen bond |                  |       |                             |                  |                   |                            |
| Comm-4            | P165                  | S70                    | hydrogen bond               |                  |       |                             | H315             | I293              | hydrogen bond              |
|                   | W95                   | L186                   | hydrophobic                 |                  |       |                             |                  |                   |                            |
| Comm-5            | D102                  | P165                   | hydrogen bond               |                  |       |                             |                  |                   |                            |
| Total Connections | 33                    |                        |                             | 19               |       |                             | 11               |                   |                            |

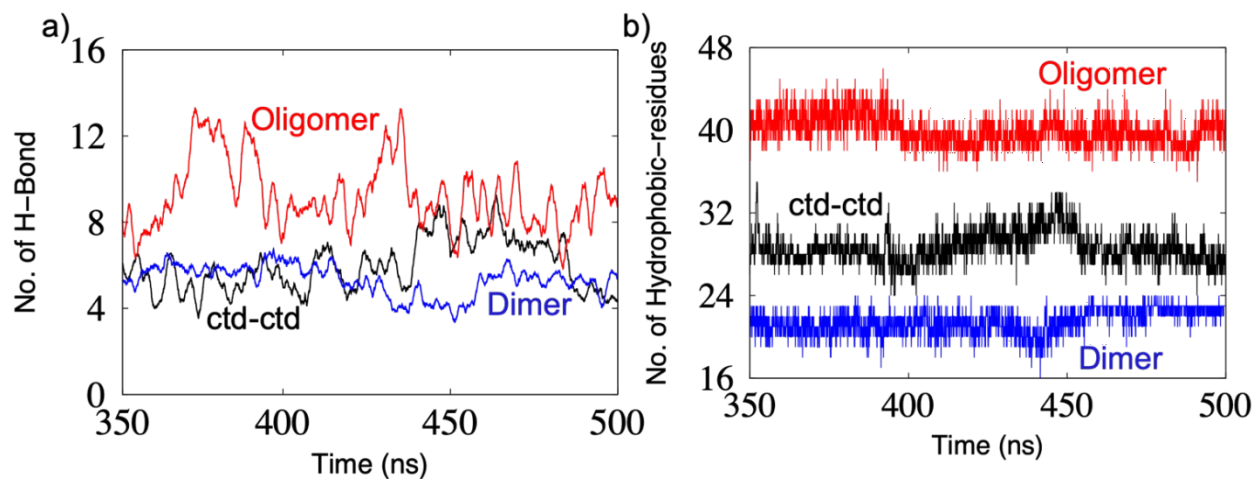

Figure S5. The time-evolution of the inter-domain contacts listed in Table 2 and Table S1.

a) Evolution of the number of hydrogen bonds with respect to time for all three interfaces for the last 150 ns. b) Number of hydrophobic residues within 6.4 Å of the domain-domain interface during the last 150 ns of simulation.
